# Supplementary material for: Migration of Microplastics and Phthalates from Face Masks to Water
Source: Molecules. 2022 Oct 13;27(20):6859. doi: 10.3390/molecules27206859 (PMC9608222; doi:10.3390/molecules27206859)
Supplement: Supplementary file 1 [file molecules-27-06859-s001.zip › molecules-1917670-supplementary.pdf]

# Supplementary material

## **MIGRATION OF MICROPLASTICS AND PHTHALATES FROM FACE MASKS TO WATER**

Giuseppina Zuri, Bernat Oró-Nolla, Ana Torres, Angeliki Karanasiau, Silvia Lacorte\*

<sup>1</sup> Institute of Environmental Assessment and Water Research of the Spanish Research Council (IDAEA-CSIC), Jordi Girona 18-26, 08034 Barcelona, Spain.

\*Corresponding author: Silvia Lacorte; Ph.: +34 934006133; E-mail: slbqam@cid.csic.es

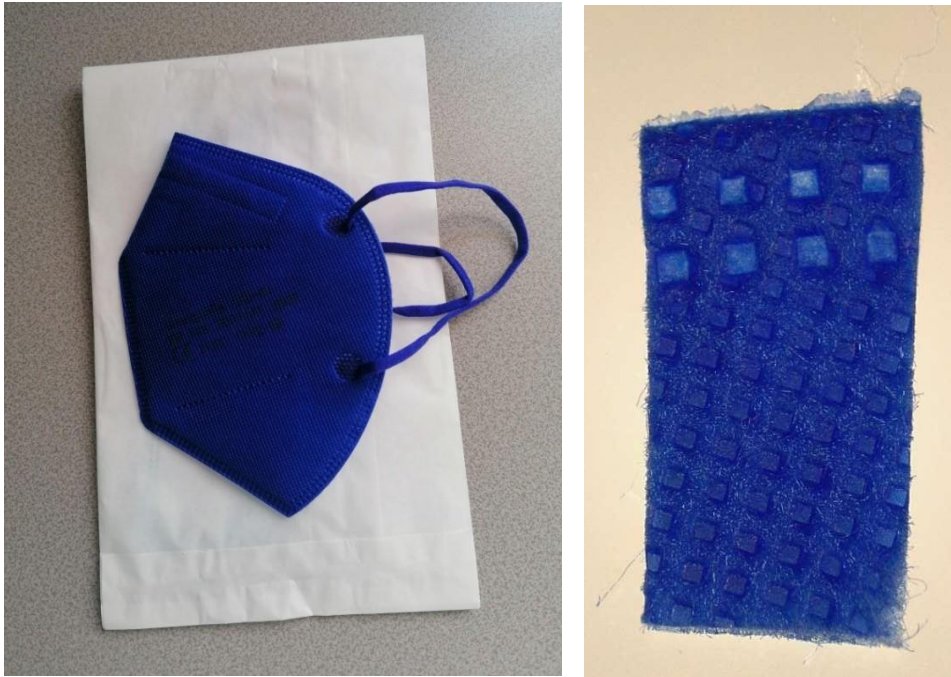

**Figure S1** Face Mask FFP2 A a) intact and b) after disassembling it in layers.

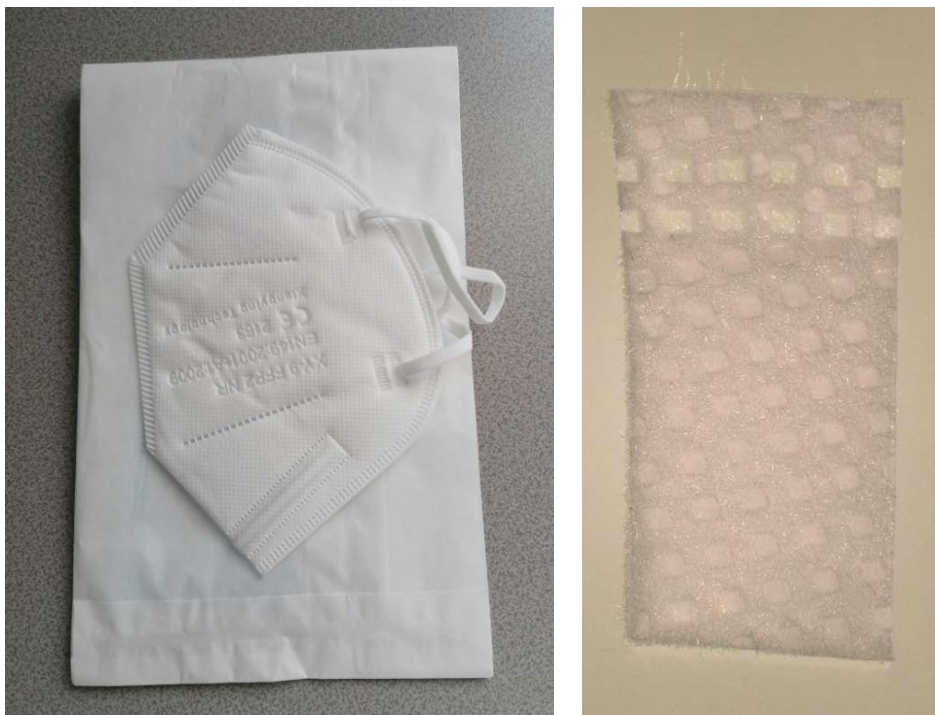

**Figure S2** Face Mask FFP2 B a) intact and b) after disassembling it in layers.

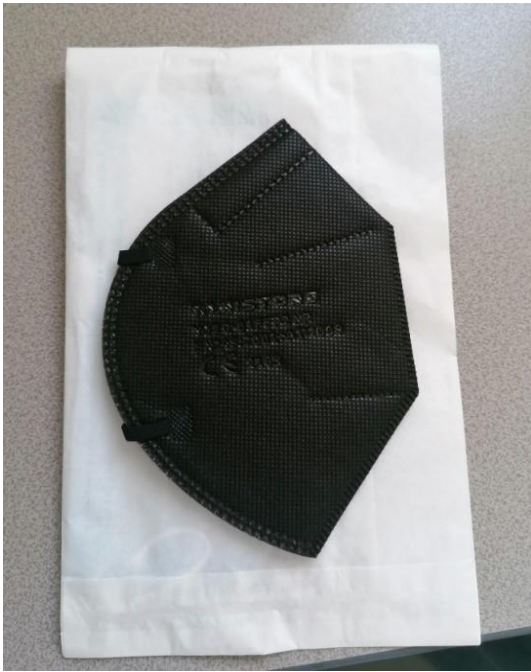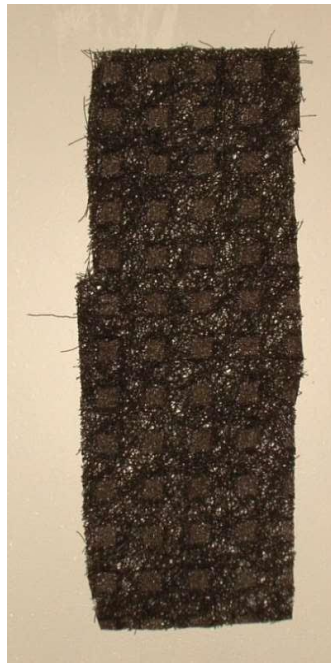

**Figure S3** Face Mask FFP2 N a) intact and b) after disassembling it in layers.

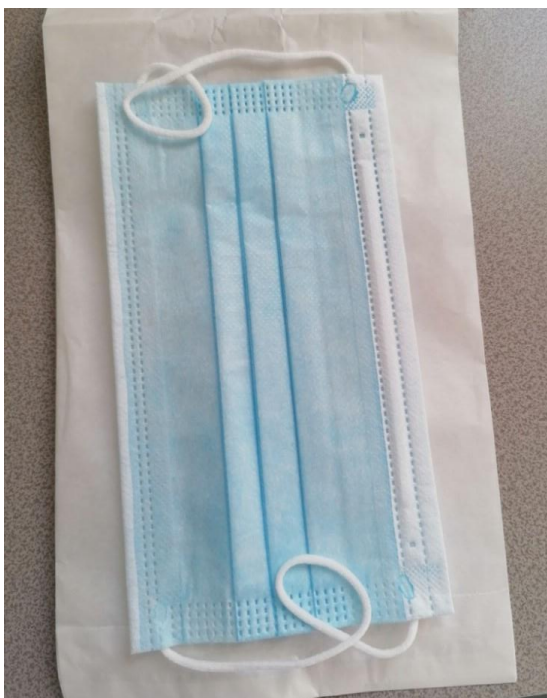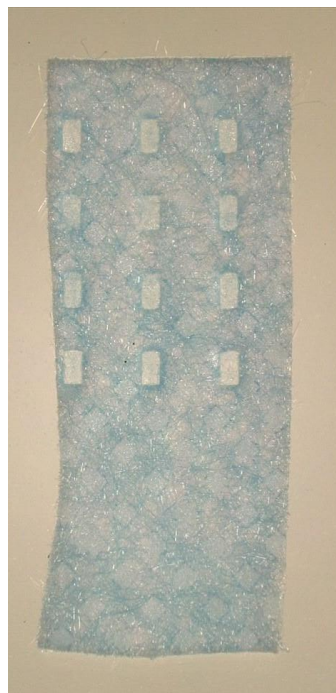

**Figure S4** Surgical Mask Q a) intact and b) after disassembling it in layers.

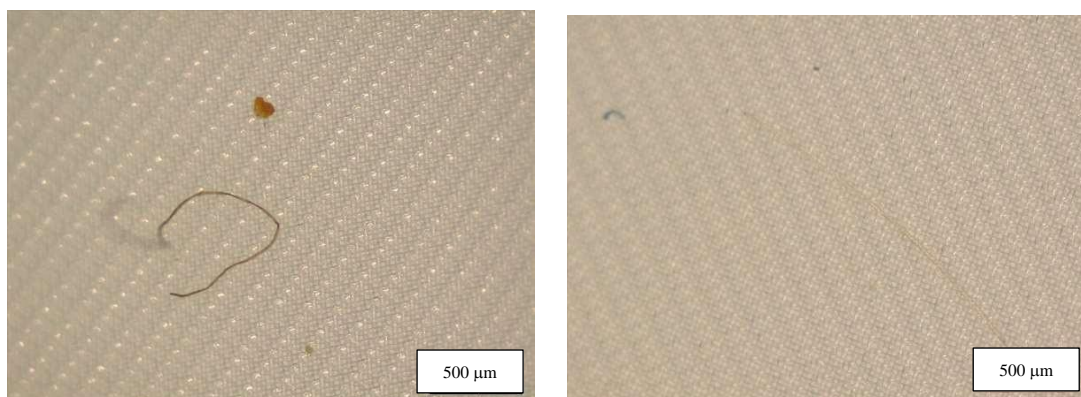

**Figure S5** Microplastics detected in the filter of Blank 1.

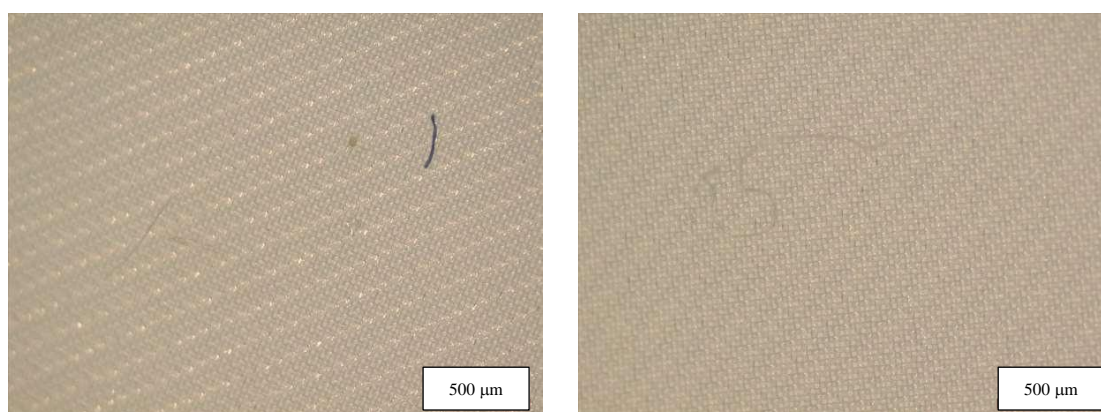

**Figure S6** Microplastics detected in the filter of Blank 2.

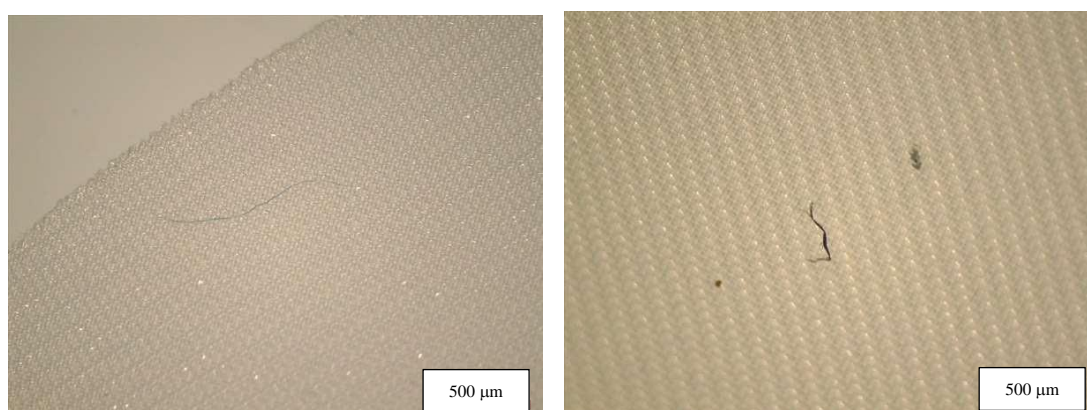

**Figure S7** Microplastics detected in the filter of Blank 3.

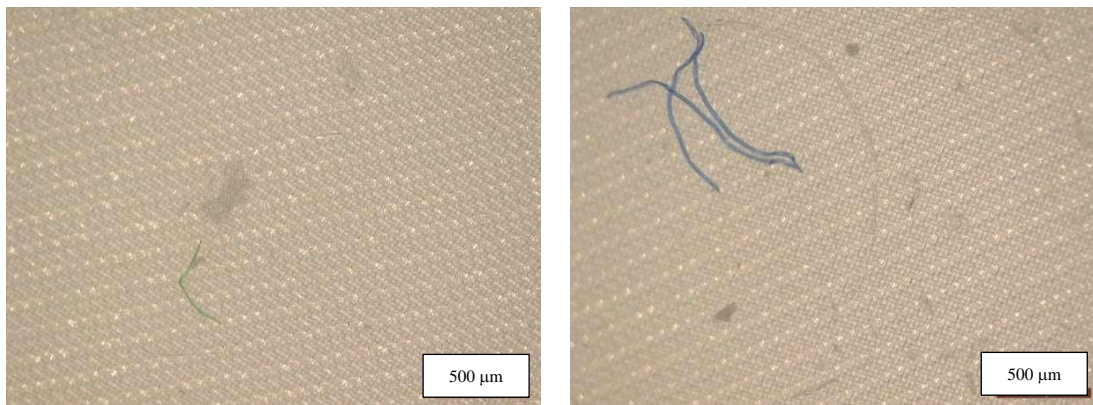

**Figure S8** Microplastics detected in the filter of FFP2 A.

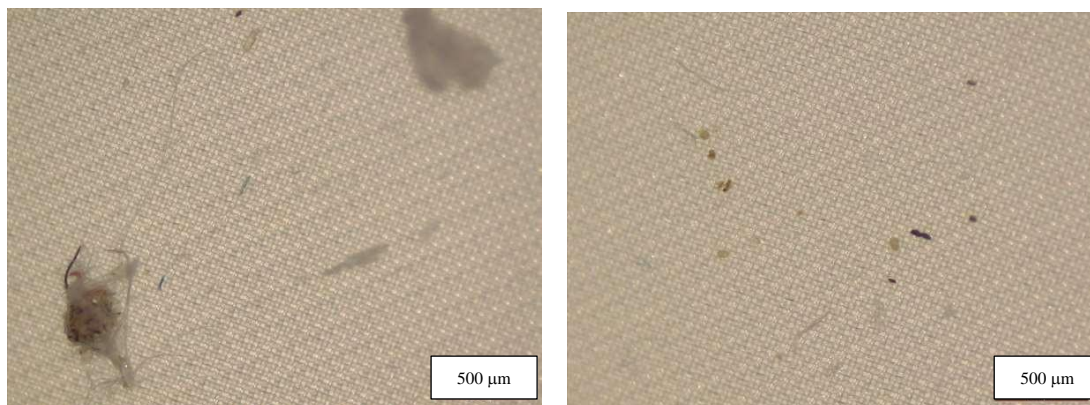

**Figure S9** Microplastics detected in the filter of FFP2 B.

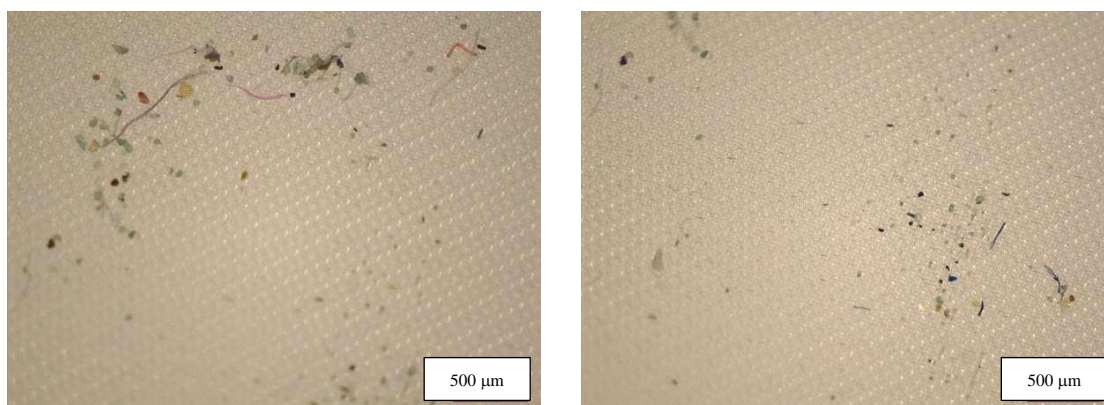

**Figure S10** Microplastics detected in the filter of FFP2 N.

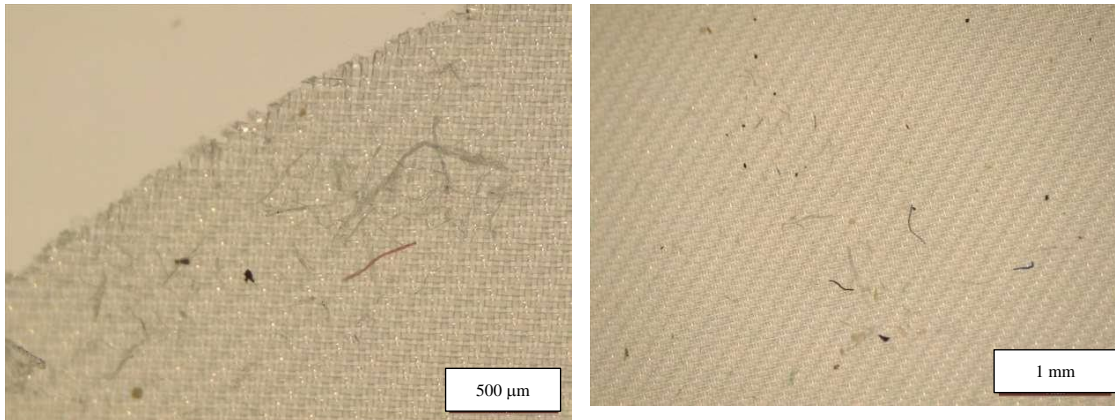

**Figure S11** Microplastics detected in the filter of Surgical Mask.
